# Supplementary material for: Low-Temperature Direct Growth of Amorphous Boron Nitride Films for High-Performance Nanoelectronic Device Applications
Source: PubMed Central journal article supplement — ACS Appl Mater Interfaces. 2023 Jan 31;15(5):7274–81. doi: 10.1021/acsami.2c18706 (PMC9923684; doi:10.1021/acsami.2c18706), 2023-01-31
Supplement: am2c18706_si_001.pdf [file am2c18706_si_001.pdf]

# Supporting Information

## Low-Temperature Direct Growth of Amorphous Boron Nitride films for High-Performance Nanoelectronic Device Applications

*Seyed Mehdi Sattari-Esfahlan<sup>1,2,3</sup>, Hyoung Gyun Kim<sup>2</sup>, Sang Hwa Hyun<sup>1,4</sup>, Jun-Hui Choi<sup>1,4</sup>,  
Hyun Sik Hwang<sup>1,4</sup>, Eui-Tae Kim<sup>5</sup>, Hyeong Gi Park<sup>6\*</sup>, and Jae-Hyun Lee<sup>1,4\*\*</sup>*

<sup>1</sup>Department of Material Science and Engineering, Ajou University, Suwon 16499, Republic of Korea

<sup>2</sup>Department of Materials Science and Engineering, Seoul National University, Seoul 08826, Republic of Korea

<sup>3</sup>Institute for Microelectronics, TU Wien, Vienna 1040, Austria

<sup>4</sup>Department of Energy Systems Research, Ajou University, Suwon 16499, Korea

<sup>5</sup>Department of Materials Science and Engineering, Chungnam National University, Daejeon 34134, Korea

<sup>6</sup>AI-Superconvergence KIURI Translational Research Center, Ajou University School of Medicine, Suwon 16499, Korea

### Corresponding authors:

Hyeong Gi Park (hgpark007@ajou.ac.kr)

Jae-Hyun Lee (jaehyunlee@ajou.ac.kr)

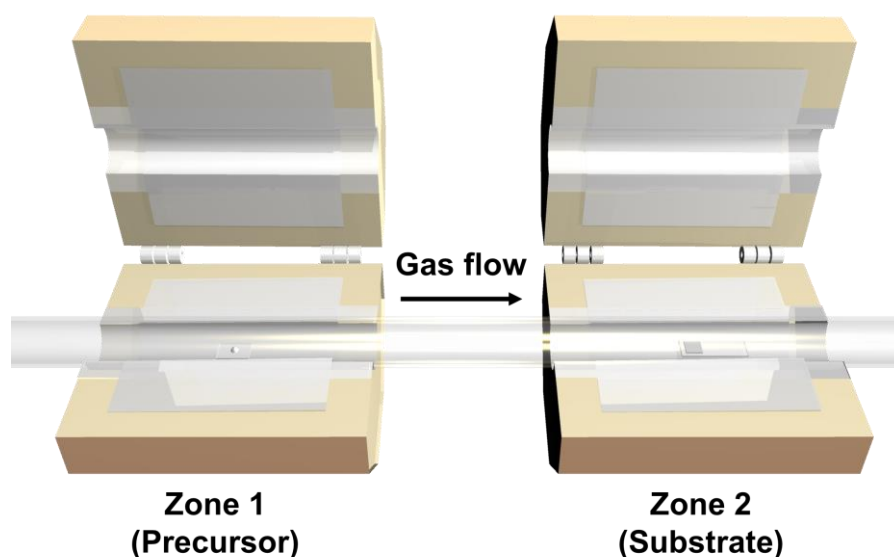

**Figure S1 Single crystal graphene growth on the Ge substrate.** Schematic illustration for the growth of graphene film using double-zone LPCVD. First, we prepared Ge substrate; to obtain high-quality graphene, the Ge (110) (0.5 mm-thick, n-type Sb doped) substrate was loaded in Zone 2 after the cleaning process (cleaned by ethanol, acetone, and methanol by ultrasonic for 10 min, respectively and then organic impurities are removed through O<sub>2</sub> plasma treatment). The temperature and pressure of Zone 2 were maintained at 920 °C and 100 Torr, respectively, and an H<sub>2</sub>/CH<sub>4</sub> (99.999%, 200/4 sccm) mixture gas was introduced. After the growth process was completed, Zone 2 was rapidly cooled to room temperature in the H<sub>2</sub> atmosphere.

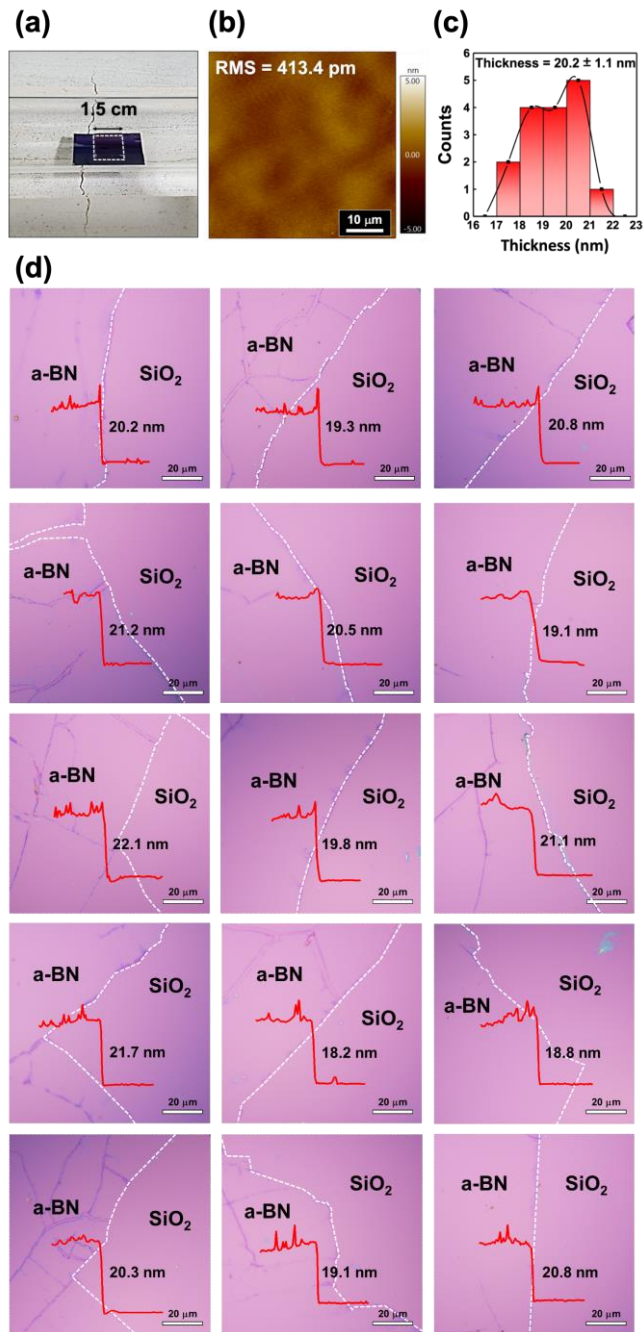

**Figure S2 Uniform growth of a-BN film on the substrate.** (a) Photo image of a-BN grown SiO<sub>2</sub>/Si substrate (1.5 x 1.5 cm<sup>2</sup>). (b) AFM image of the as-grown a-BN surface obtained from the region indicated with a white arrow in (a). We observed that the average root mean square (RMS) roughness of the a-BN measured by AFM is about 413 pm. (c,d) Height statistical analysis of a-BN samples. We prepared 15 a-BN samples under the optimized growth condition as described in main text and measured the height of them. Average thickness of a-BN film is about 20.0 nm, and its standard deviation is 1.1 nm.

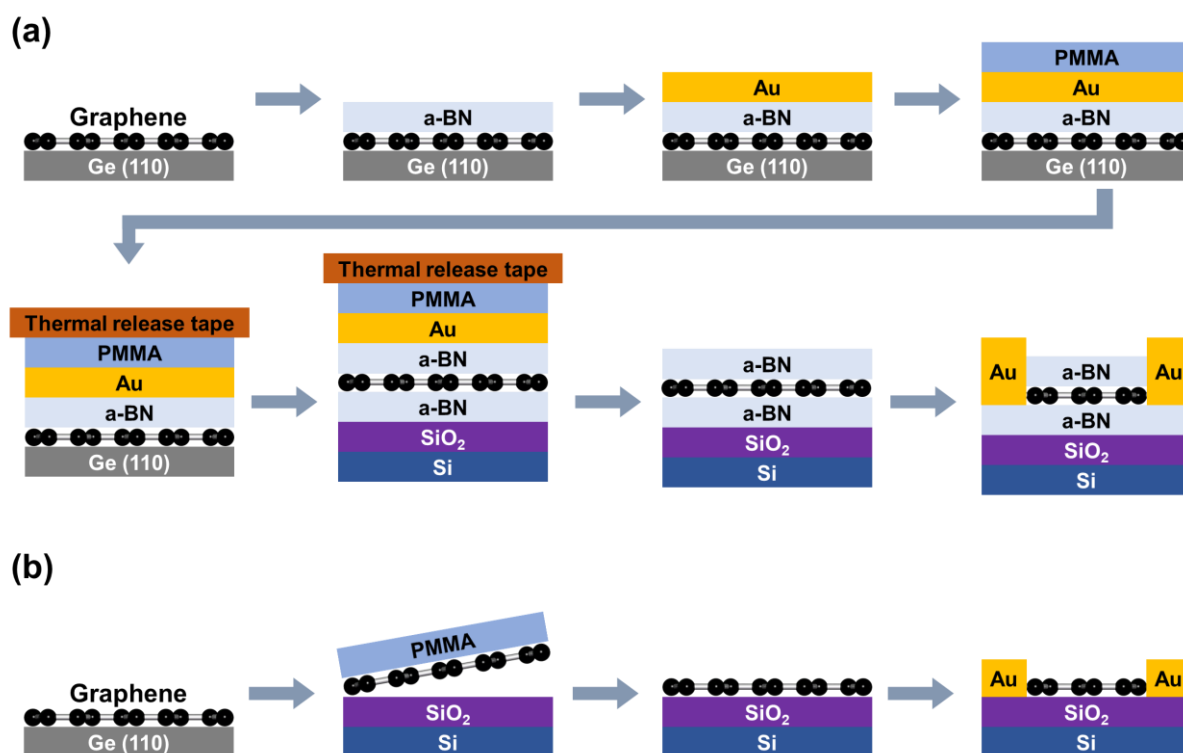

**Figure S3 Fabrication process for Gr/SiO<sub>2</sub> and a-BN/Gr/a-BN FET devices.** (a) Schematic illustration for encapsulation and device fabrication processes of a-BN/Gr/a-BN. (b) Schematic illustration for device fabrication processes of Gr/SiO<sub>2</sub>. For comparison, we fabricated a graphene FET device based on Gr/SiO<sub>2</sub> sample. After graphene is grown on Ge substrate, we spin-coated PMMA on the graphene and baked at 120°C. The bottom Ge substrate was etched away by the mixture of H<sub>2</sub>O<sub>2</sub> and HF solutions. The PMMA/Gr films were then floated on the DI water for 10 min and transferred onto the SiO<sub>2</sub>/Si substrate. The two-terminal structure was patterned by standard photolithography (width: 2.0 μm and length: 3.0 μm). A thermal evaporator was used to deposit 15 nm Cr and 85 nm Au metals as metal electrodes for the source and drain of the FET devices. The graphene FET (GFET) was annealed at 180 °C for 1.5 hours to enhance the adhesion between the electrodes and the graphene channel, and to eliminate the oxygen functional groups adsorbed on the graphene surface

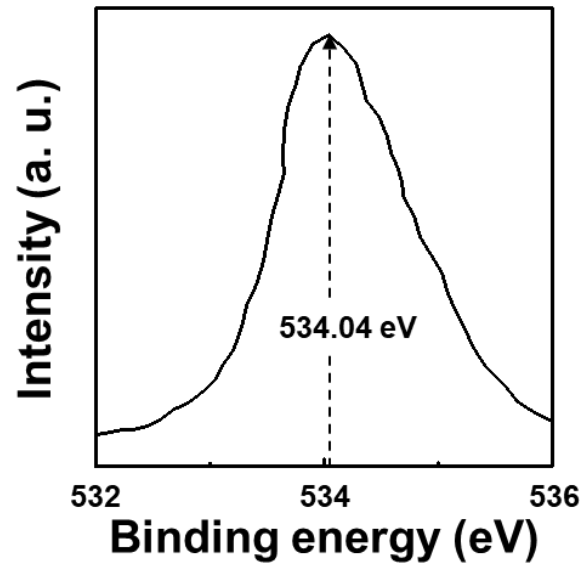

Figure S4 O1s peak acquired from the bare SiO<sub>2</sub>/Si substrate.

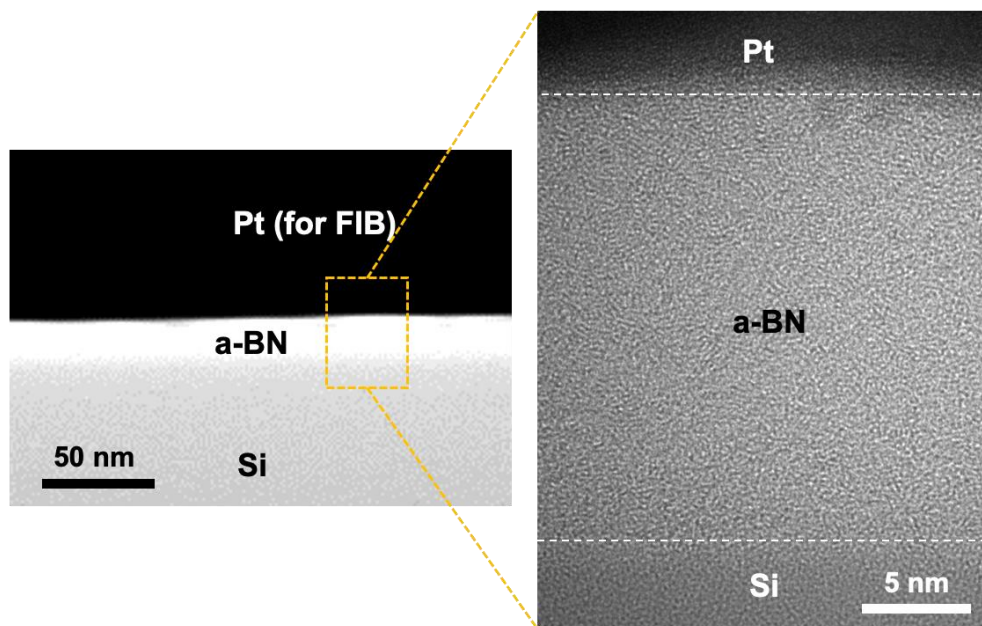

Figure S5 Cross-sectional HR-TEM image of the a-BN film on a Si substrate. (a) low-magnification and (b) high-magnification cross-sectional HR-TEM image of a-BN film on Si substrate for capacitance measurements. It should be noted that three a-BN samples were obtained from the same batch.

**Table S1.** Comparison of the carrier mobility of reported GFET with h-BN.

| <b>Device structure</b> | <b>Type of h-BN</b>    | <b>h-BN growth temperature</b> | <b>Type of Graphene</b> | <b>Mobility (cm<sup>2</sup>/Vs)@RT</b> | <b>Ref</b> |
|-------------------------|------------------------|--------------------------------|-------------------------|----------------------------------------|------------|
| <b>Gr/h-BN</b>          | Mechanical exfoliation | N/A                            | Mechanical exfoliation  | < 140,000                              | [1]        |
| <b>Gr/h-BN</b>          | Mechanical exfoliation | N/A                            | Mechanical exfoliation  | 28,630                                 | [2]        |
| <b>Gr/h-BN</b>          | Mechanical exfoliation | N/A                            | Mechanical exfoliation  | 6,000                                  | [3]        |
| <b>h-BN/Gr/h-BN</b>     | Mechanical exfoliation | N/A                            | Mechanical exfoliation  | < 120,000                              | [4]        |
| <b>h-BN/Gr/h-BN</b>     | Mechanical exfoliation | N/A                            | Mechanical exfoliation  | < 100,000                              | [5]        |
| <b>h-BN/Gr/h-BN</b>     | Mechanical exfoliation | N/A                            | Mechanical exfoliation  | 36,000                                 | [6]        |
| <b>h-BN/Gr/h-BN</b>     | Mechanical exfoliation | N/A                            | Mechanical exfoliation  | 4,000                                  | [7]        |
| <b>h-BN/Gr/h-BN</b>     | Mechanical exfoliation | N/A                            | CVD                     | 70,000                                 | [8]        |
| <b>h-BN/Gr</b>          | CVD                    | Commercial Product             | CVD                     | 5,000                                  | [9]        |
| <b>h-BN/Gr</b>          | CVD                    | Commercial Product             | CVD                     | 4,140                                  | [10]       |
| <b>h-BN/Gr</b>          | CVD                    | Commercial Product             | CVD                     | 3,150                                  | [11]       |
| <b>a-BN/Gr/a-BN</b>     | LPCVD                  | 250°C                          | CVD                     | < 17,000                               | This work  |

**Table S2.** Comparison of the different growth methods for a-BN films

| <b>Method</b>                 | <b>Growth Temp. (Pressure)</b>                            | <b>Properties of a-BN</b>                                                                                   | <b>Ref</b> |
|-------------------------------|-----------------------------------------------------------|-------------------------------------------------------------------------------------------------------------|------------|
| <b>PVD (PLD<sup>1)</sup>)</b> | 200 °C (50 mTorr )                                        | Dielectric constant 5.9±0.7 at 1 kHz<br>Breakdown voltage 9.8±1.0 MV/cm                                     | [12]       |
| <b>PVD (PLD)</b>              | 200 °C (5 - 100 mTorr)<br>+ 400 °C post-annealing process | Mobility enhancement of the graphene by capping of the a-BN film (single-side)                              | [13]       |
| <b>PVD (MS<sup>2)</sup>)</b>  | 500 °C (0.5 Pa)                                           | vacuum-ultraviolet photodetection<br>photo-responsivity 4.8 $\mu$ A/W at 10 V                               | [14]       |
| <b>ICP-CVD<sup>3)</sup></b>   | 400 °C (> 0.1 mTorr)                                      | Dielectric constant 1.16 at 1 MHz<br>Breakdown voltage 7.3 MV/cm                                            | [15]       |
| <b>ICP-CVD</b>                | 400 °C ( 1.4 Torr)                                        | Dielectric constant 2.11 at 100 kHz                                                                         | [16]       |
| <b>PECVD<sup>4)</sup></b>     | 350 °C (N/A)                                              | Bandgap 5 eV<br>Breakdown voltage 2.2 MV/cm                                                                 | [17]       |
| <b>LPCVD<sup>5)</sup></b>     | 500 °C (N/A)                                              | Mobility enhancement of the 2D materials by capping of the a-BN film (single-side)                          | [18]       |
| <b>LPCVD</b>                  | 250 °C (110 Torr)                                         | Dielectric constant 1.25 at 1 MHz<br>Mobility enhancement of the graphene by encapsulating of the a-BN film | This work  |

<sup>1)</sup>PLD: Pulsed Laser Deposition; <sup>2)</sup>MS: Magnetron sputtering; <sup>3)</sup>ICP-CVD: Inductively Coupled Plasma Chemical Vapor Deposition; <sup>4)</sup>PECVD: Plasma Enhanced Chemical Vapor Deposition; <sup>5)</sup>LPCVD: Low Pressure Chemical Vapor Deposition

## References

- [1] Dean, C. R.; Young, A. F.; Meric, I.; Lee, C.; Wang, L.; Sorgenfrei, S.; Watanabe, K.; Taniguchi, T.; Kim, P.; Shepard, K. L.; Hone, J. Boron nitride substrates for high-quality graphene electronics, *Nat. Nanotechnol.* **2010**, *5*, 722-726.
- [2] Xu, H.; Wu, J.; Chen, Y.; Zhang, H.; Zhang, J. Substrate Engineering by Hexagonal Boron Nitride/SiO<sub>2</sub> for Hysteresis-Free Graphene FETs and Large-Scale Graphene p-n Junctions, *Chem. Asian J.* **2013**, *8*, 2446-2452
- [3] Kayyahlha, M.; Chen, Y. P. Observation of reduced 1/f noise in graphene field effect transistors on boron nitride substrates, *Appl. Phys. Lett.* **2015**, *107*, 113101.
- [4] Ponomarenko, L. A.; Geim, A. K.; Zhukov, A. A.; Jalil, R.; Novoselov.; Grigorieva, I. V.; Hill, E. H.; Cheianov, V. V.; Fal'ko, V. I.; Watanabe, K.; Taniguchi, T.; Gorbachev, R. V. Tunable Metal-Insulator Transition in Double-Layer Graphene Heterostructures, *Nat. Phys.* **2011**, *7*, 958-961.
- [5] Mayorov, A. S.; Gorbachev, R. V.; Morozov, S. V.; Britnell, L.; Jalil, R.; Ponomarenko, L. A.; Blake, P.; Novoselov, K. S.; Watanabe, K.; Taniguchi, T.; Geim, A. K. Micrometer-Scale Ballistic Transport in Encapsulated Graphene at Room Temperature, *Nano Lett.* **2011**, *11*, 2396-2399.
- [6] Stolyarov, M. A.; Liu, G.; Romyantsev, S. L.; Shur, M.; Balandin, A. A. Suppression of 1/f noise in near-ballistic h-BN-graphene-h-BN heterostructure field-effect transistors, *Appl. Phys. Lett.* **2015**, *107*, 023106.
- [7] Neumann, C.; Reichardt, S.; Drögeler, M.; Terrés, B.; Watanabe, K.; Taniguchi, T.; Beschoten, B.; Rotkin, S. V.; Stampfer, C. Low B field Magneto-Phonon Resonances in Single-Layer and Bilayer Graphene, *Nano Lett.* **2015**, *15*, 3, 1547-1552.
- [8] De Fazio, D.; Purdie, D. G.; Ott, A. K.; Braeuninger-Weimer, P.; Khodkov, T.; Goossens, S.; Taniguchi, T.; Watanabe, K.; Livreri, P.; Koppens, F. H. L.; Hofmann, S.; Goykhman, I.; Ferrari, A. C.; Lombardo, A. High-Mobility, Wet-Transferred Graphene Grown by Chemical Vapor Deposition, *ACS Nano.* **2019**, *13*, 8, 8926-8935.
- [9] Giambra, M. A.; Mišeikis, V.; Pezzini, S.; Marconi, S.; Montanaro, A.; Fabbri, F.; Sorianello, V.; Ferrari, A. C.; Coletti, C.; Romagnoli, M. Wafer-Scale Integration of Graphene-Based Photonic Devices, *ACS Nano* **2021**, *15*, 2, 3171-3187.
- [10] Gao, X.; Yu, C.; He, Z.; Guo, J.; Liu, Q.; Zhou, C.; Cai, S.; Feng, Z. Contaminant-Free Wafer-Scale Assembled h-BN/Graphene van der Waals Heterostructures for Graphene Field-Effect Transistors, *ACS. Appl. Nano Mater.* **2021**, *4*, 5677-5684.
- [11] Shautsova, V.; Gilbertson, A. M.; Black, N. C. G.; Maier, S. A.; Cohen, L. F. Hexagonal



Boron Nitride assisted transfer and encapsulated of large area CVD graphene, *Sci. Rep.* **2016**, 6, 30210.

[12] Glavin, N. R.; Muratore, C.; Jespersen, M. L.; Hu, J.; Hagerty, P. T.; Hilton, A. M.; Blake, A. T.; Grabowski, C. A.; Durstock, M. F.; McConney, M. E.; Hilgert, D. M.; Fisher, T. S.; Voevodin, A. A. Amorphous Boron Nitride: A Universal, Ultrathin Dielectric For 2D Nanoelectronics, *Adv. Funct. Mater.* **2016**, 26, 2640-2647.

[13] Uddin, M. A.; Glavin, N.; Singh, A.; Naguy, R.; Jespersen, M.; Voevodin, A.; Koley, G. Mobility Enhancement in Graphene Transistors on Low Temperature Pulsed Laser Deposited Boron Nitride, *Appl. Phys. Lett.* **2015**, 107, 203110.

[14] Li, Y.; Guo, J.; Huang, F. Amorphous Boron Nitride for Vacuum-Ultraviolet Photodetection, *Appl. Phys. Lett.* **2020**, 117, 023504.

[15] Hong, S.; Lee, C.-S.; Lee, M.-H.; Lee, Y.; Ma, K. Y.; Kim, G.; Yoon, S. I.; Ihm, K.; Kim, K.-J.; Shin, T. J.; Kim, S. W.; Jeon, E.-C.; Jeon, H.; Kim, J.-Y.; Lee, H.-I.; Lee, Z.; Antidormi, A.; Roche, S.; Chhowalla, M.; Shin, H.-J.; Shin, H. S. Ultralow-dielectric-constant amorphous boron nitride, *Nature* **2020**, 582, 511-514.

[16] Lin, C.-M.; Hsu, C.-H.; Huang, W.-Y.; Astié, V.; Cheng, P.-H.; Lin, Y.-M.; Hu, W.-S.; Chen, S.-H.; Lin, H.-Y.; Li, M.-Y.; Magyari-Kope, B.; Yang, C.-M.; Decams, J.-M.; Lee, T.-L.; Gui, D.; Woon, W.-Y.; Lin, P.; Wu, J.; Lee, J.-J.; Liao, S. S.; Cao, M. Ultralow-k Amorphous Boron Nitride Based on Hexagonal Ring Stacking Framework for 300 nm Silicon Technology Platform, *Adv. Mater. Technol.* **2022**, 7, 2200022.

[17] Zedlitz, R.; Heintze, M.; Schubert, M. B. Properties of Amorphous Boron Nitride Thin Films, *J. Non-Cryst. Solids*, **1996**, 198-200, 403-406.

[18] Lu, Z.; Zhu, M.; Liu, Y.; Zhang, G.; Tan, Z.; Li, X.; Xu, S.; Wang, L.; Dou, R.; Wang, B.; Yao, Y.; Zhang, Z.; Dong, J.; Cheng, Z.; Chen, S. Low-Temperature Synthesis of Boron Nitride as a Large-Scale Passivation and Protection Layer for Two-Dimensional Materials and High-Performance Devices, *ACS Appl. Mater. Interfaces* **2022**, 14, 22, 25984–25992.
